# Supplementary material for: Quinquelaophonte enormis sp. nov., a new interstitial copepod (Harpacticoida: Laophontidae) from Korea
Source: PeerJ. 2020 Sep 22;8:e10007. doi: 10.7717/peerj.10007 (PMC7518157; doi:10.7717/peerj.10007)
Supplement: Supplemental Information 2 — Body length of holotype to paratype 12, mean of length for each sex, collecting sites, where specimens are deposited, and deposit numbers for each specimen. [file peerj-08-10007-s002.xlsx]

## Sheet: Sheet1
		specimen	length (rostrum to caudal rami)	mean	collecting site	Where specimens deposited	deposit number
	female	holotype	760	827	type locality (Gijang, Korea)	National Institute of Biological Resources (Incheon, Korea)	NIBRIV0000865933
		paratype 1	not measured		type locality	National Institute of Biological Resources (Incheon, Korea)	NIBRIV0000865934
		paratype 2	916		type locality	National Institute of Biological Resources (Incheon, Korea)	NIBRIV0000865935
		paratype 3	not measured		type locality	National Institute of Biological Resources (Incheon, Korea)	NIBRIV0000865936
		paratype 4	805		type locality	National Institute of Biological Resources (Incheon, Korea)	NIBRIV0000865937
		paratype 14	not measured		type locality	National Institute of Biological Resources (Incheon, Korea)	NIBRIV0000865947
	male	paratype 5	774	729.429	type locality	National Institute of Biological Resources (Incheon, Korea)	NIBRIV0000865938
		paratype 6	not measured		type locality	National Institute of Biological Resources (Incheon, Korea)	NIBRIV0000865939
		paratype 7	734		type locality	National Institute of Biological Resources (Incheon, Korea)	NIBRIV0000865940
		paratype 8	725		type locality	National Institute of Biological Resources (Incheon, Korea)	NIBRIV0000865941
		paratype 9	725		type locality	National Institute of Biological Resources (Incheon, Korea)	NIBRIV0000865942
		paratype 10	691		type locality	National Institute of Biological Resources (Incheon, Korea)	NIBRIV0000865943
		paratype 11	760		type locality	National Institute of Biological Resources (Incheon, Korea)	NIBRIV0000865944
		paratype 12	697		type locality	National Institute of Biological Resources (Incheon, Korea)	NIBRIV0000865945
		paratype 13	not measured		type locality	National Institute of Biological Resources (Incheon, Korea)	NIBRIV0000865946
		paratype 15	not measured		type locality	National Institute of Biological Resources (Incheon, Korea)	NIBRIV0000865948
		paratype 16	not measured		type locality	National Institute of Biological Resources (Incheon, Korea)	NIBRIV0000865949
